# Supplementary material for: Size-dependent surface photovoltage in CdSe nanocrystal-based thin films
Source: Royal Society of Chemistry journal article supplement (doi:10.1039/c5ra02007g), 2015-01-01
Supplement: c5ra02007g1.pdf [file c5ra02007g1.pdf]

## Supplementary Materials:

# Size-Dependent Surface Photovoltage in CdSe Nanocrystal-Based Thin Films

*Ning Li,<sup>1</sup> Hongzhe Wang,<sup>1</sup> Qingli Lin,<sup>1,2</sup> Huaibin Shen,<sup>1</sup> Aqiang Wang,*

*<sup>1</sup> Lei Qian,<sup>1</sup> Fang Guo,<sup>2,\*</sup> Lin Song Li<sup>1,\*</sup>*

<sup>1</sup>Key Laboratory for Special Functional Materials of Ministry of Education,

Henan University, Kaifeng 475004, China

<sup>2</sup>College of Chemistry, Liaoning University, Shenyang 110036, China

E-mail: lsli@henu.edu.cn, fguo@lnu.edu.cn.

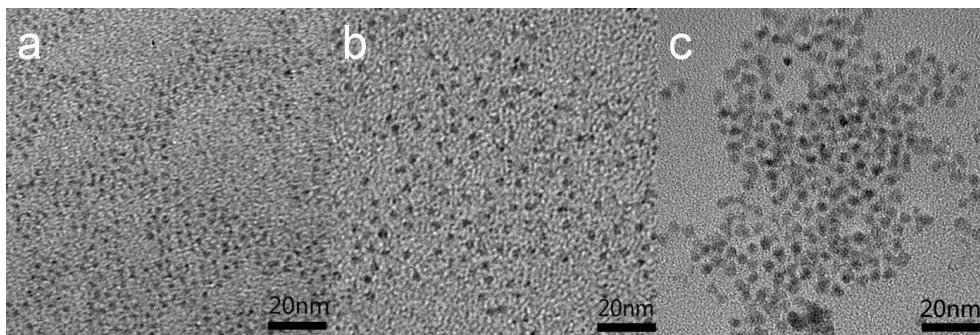

**Fig. S1** TEM images for CdSe nanocrystals, particle sizes of are 2.0 nm (a), 2.8 nm (b), and 4.9 nm (c), respectively.

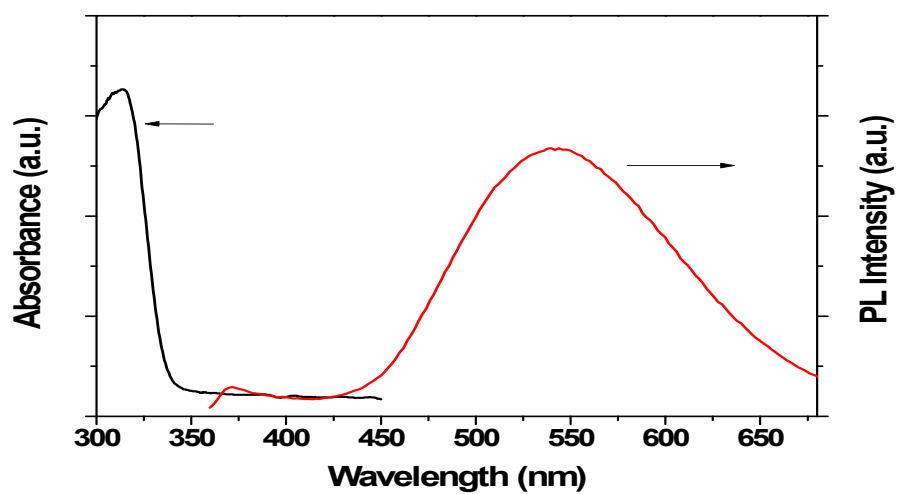

**Fig. S2** UV-vis absorption and photoluminescence spectra of ZnO nanoparticles.

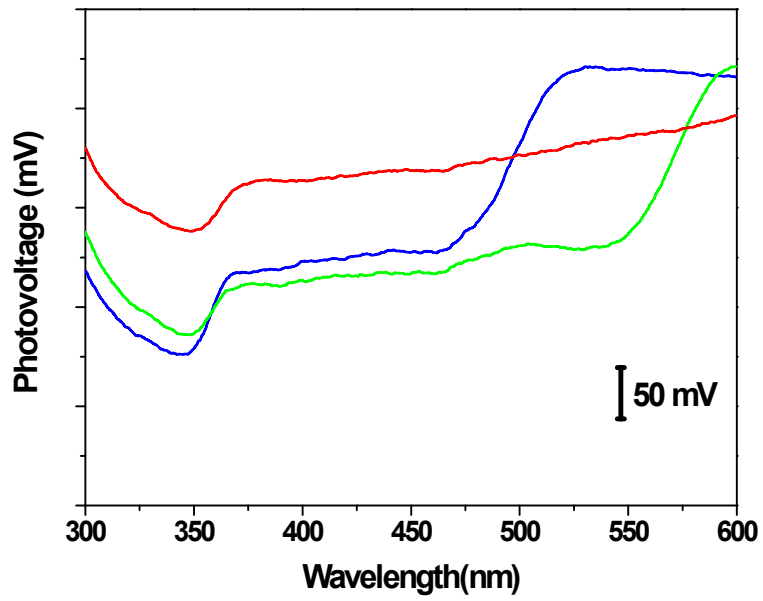

**Fig. S3** Surface photovoltage spectra of CdSe/ZnO junctions. Particle sizes of CdSe nanocrystals are 2.0 nm (blue), 2.8 nm (green), and 4.9 nm (red), respectively. Scanning range is from 600 nm to 300 nm by Grating 1.
